# Supplementary material for: Enhanced HCHO gas sensing properties by Ag-loaded sunflower-like In2O3 hierarchical nanostructures
Source: Royal Society of Chemistry journal article supplement (doi:10.1039/c3ta15110g), 2014-01-01
Supplement: c3ta15110g1.pdf [file c3ta15110g1.pdf]

## Electronic Supplementary Information for

### **Enhanced HCHO gas sensing properties by Ag-loaded sunflower-like In<sub>2</sub>O<sub>3</sub> hierarchical nanostructures**

Shuangming Wang, Bingxin Xiao, Tianye Yang, Pan Wang, Chuanhai Xiao, Zhifang Li, Rui Zhao,  
and Mingzhe Zhang\*

State Key Laboratory of Superhard Materials, Jilin University, Changchun 130012, People's  
Republic of China.

\* Corresponding author. E-mail address: zhangmz@jlu.edu.cn.

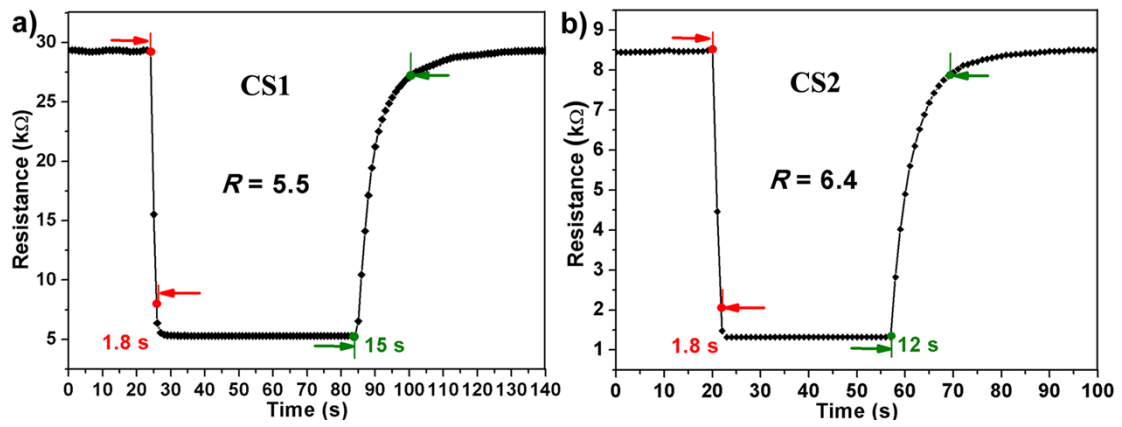

Fig. S1 (a-b) Response transients of the CS1 and CS2 sensor to 20 ppm HCHO at 240 °C, respectively.
